# Supplementary material for: Integrated genetic and epigenetic analysis of myxofibrosarcoma
Source: PubMed Central journal article supplement (PMC6050269; doi:10.1038/s41467-018-03891-9), 2018-07-17
Supplement: 41467_2018_3891_MOESM1_ESM.pdf [file 41467_2018_3891_MOESM1_ESM.pdf]

## **Supplementary Information**

### **Integrated genetic and epigenetic analysis of myxofibrosarcoma**

**Ogura et al.**

- 1. Supplementary Figures 1-8**
- 2. Supplementary Tables 1-3**

**a****Amplification**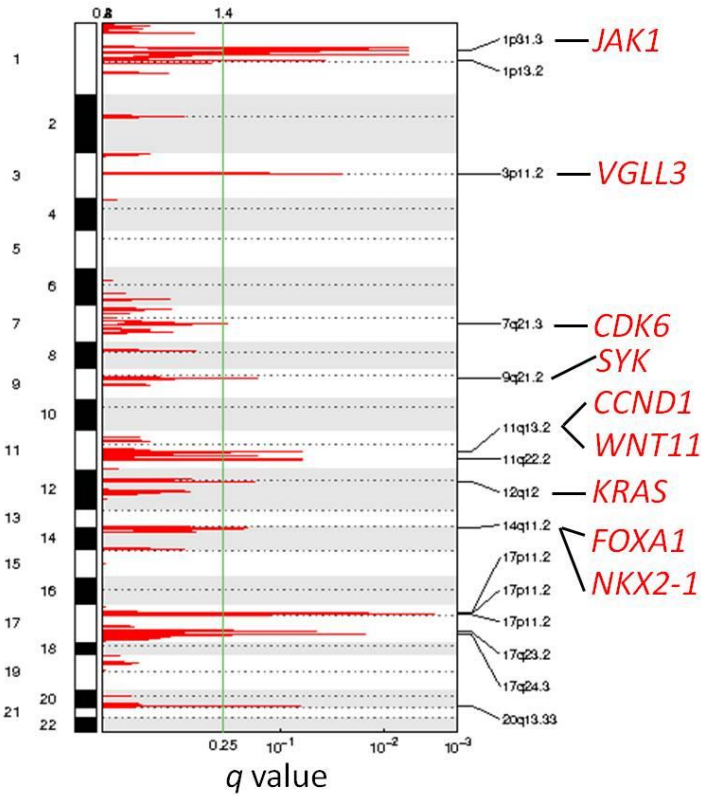**b****Homozygous deletion**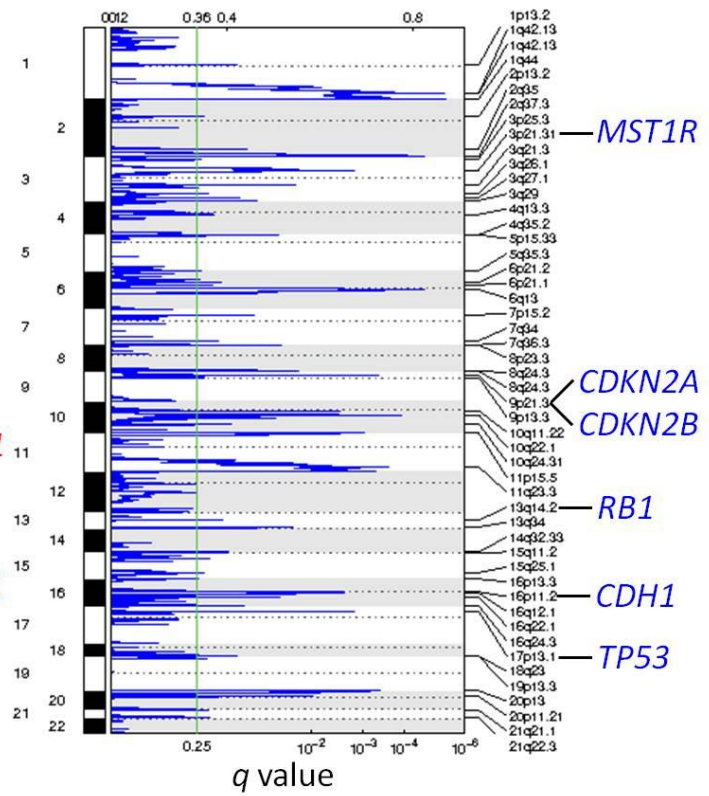**Supplementary Figure 1. Significant copy number alterations in 41 MFSs**

Regions showing statistically significant focal amplifications (a) and homozygous deletions (b) detected using the GISTIC 2.0 algorithm. For each *q*-value peak, putative gene targets are listed.

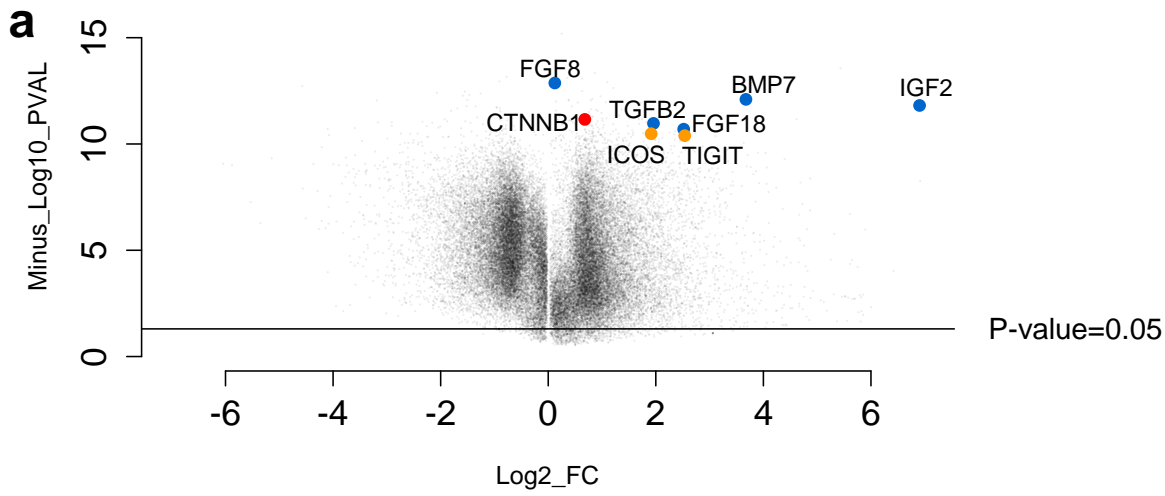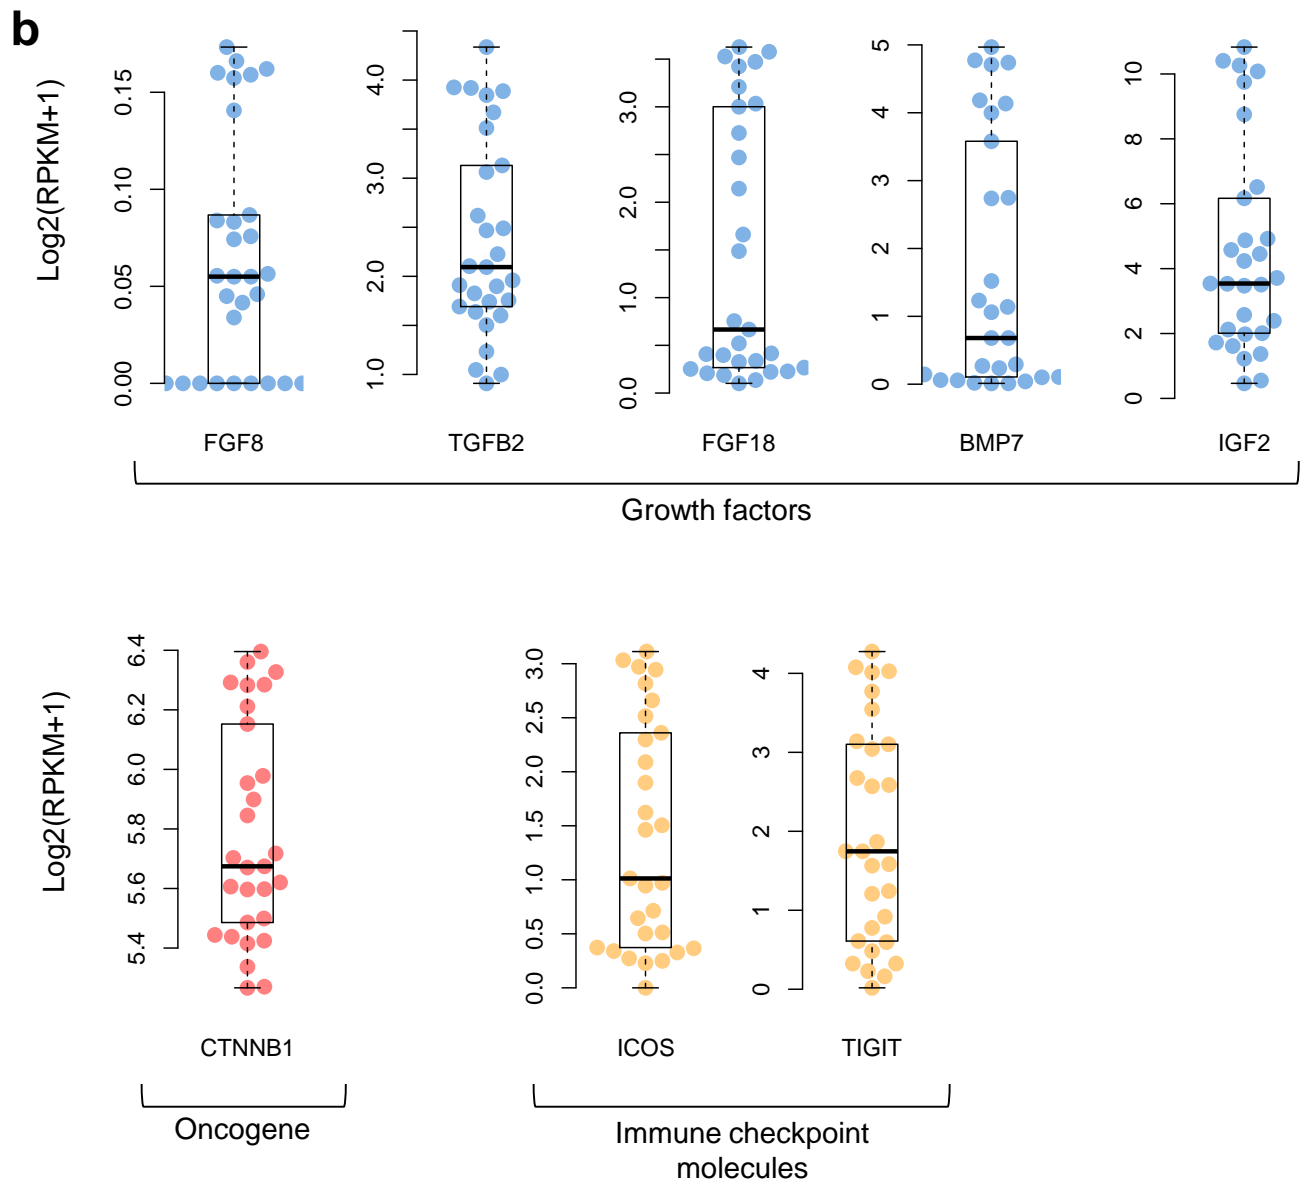

**Supplementary Figure 2. Significantly up-regulated genes among 29 MFSS**

(a) Distribution of significantly up-regulated genes. Interesting molecules with the top-ranked genes were shown: growth factors (*FGF8*, *BMP7*, *IGF2*, *TGFB2*, and *FGF18*), oncogenes (*CTNNB1*), and immune-related molecules (*ICOS* and *TIGIT*).

(b) Distribution of 29 MFSS in each gene.

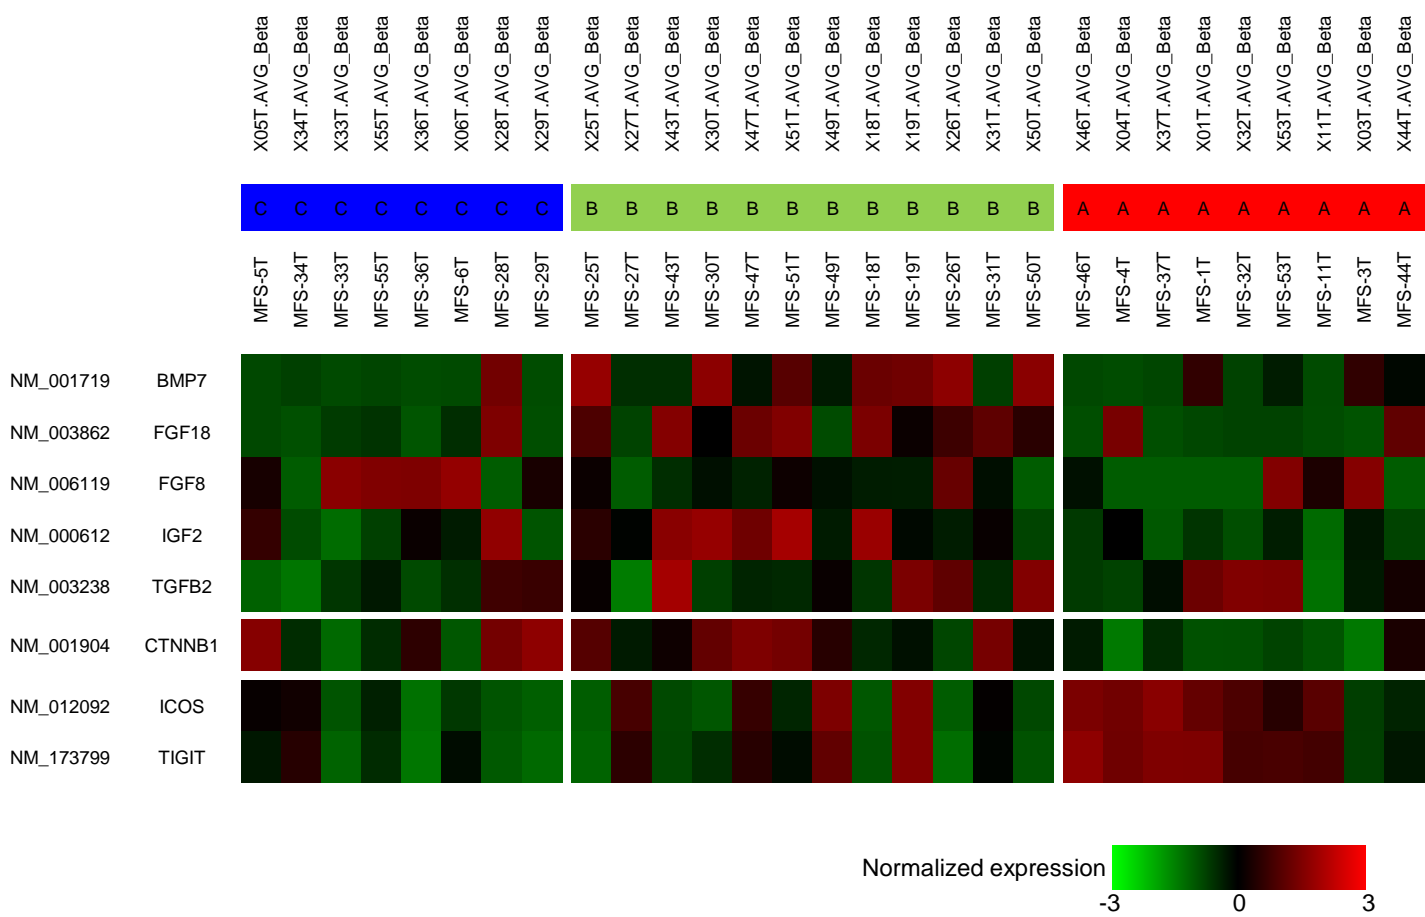

**Supplementary Figure 3. Relation between methylation clusters and expression of significantly up-regulated genes**

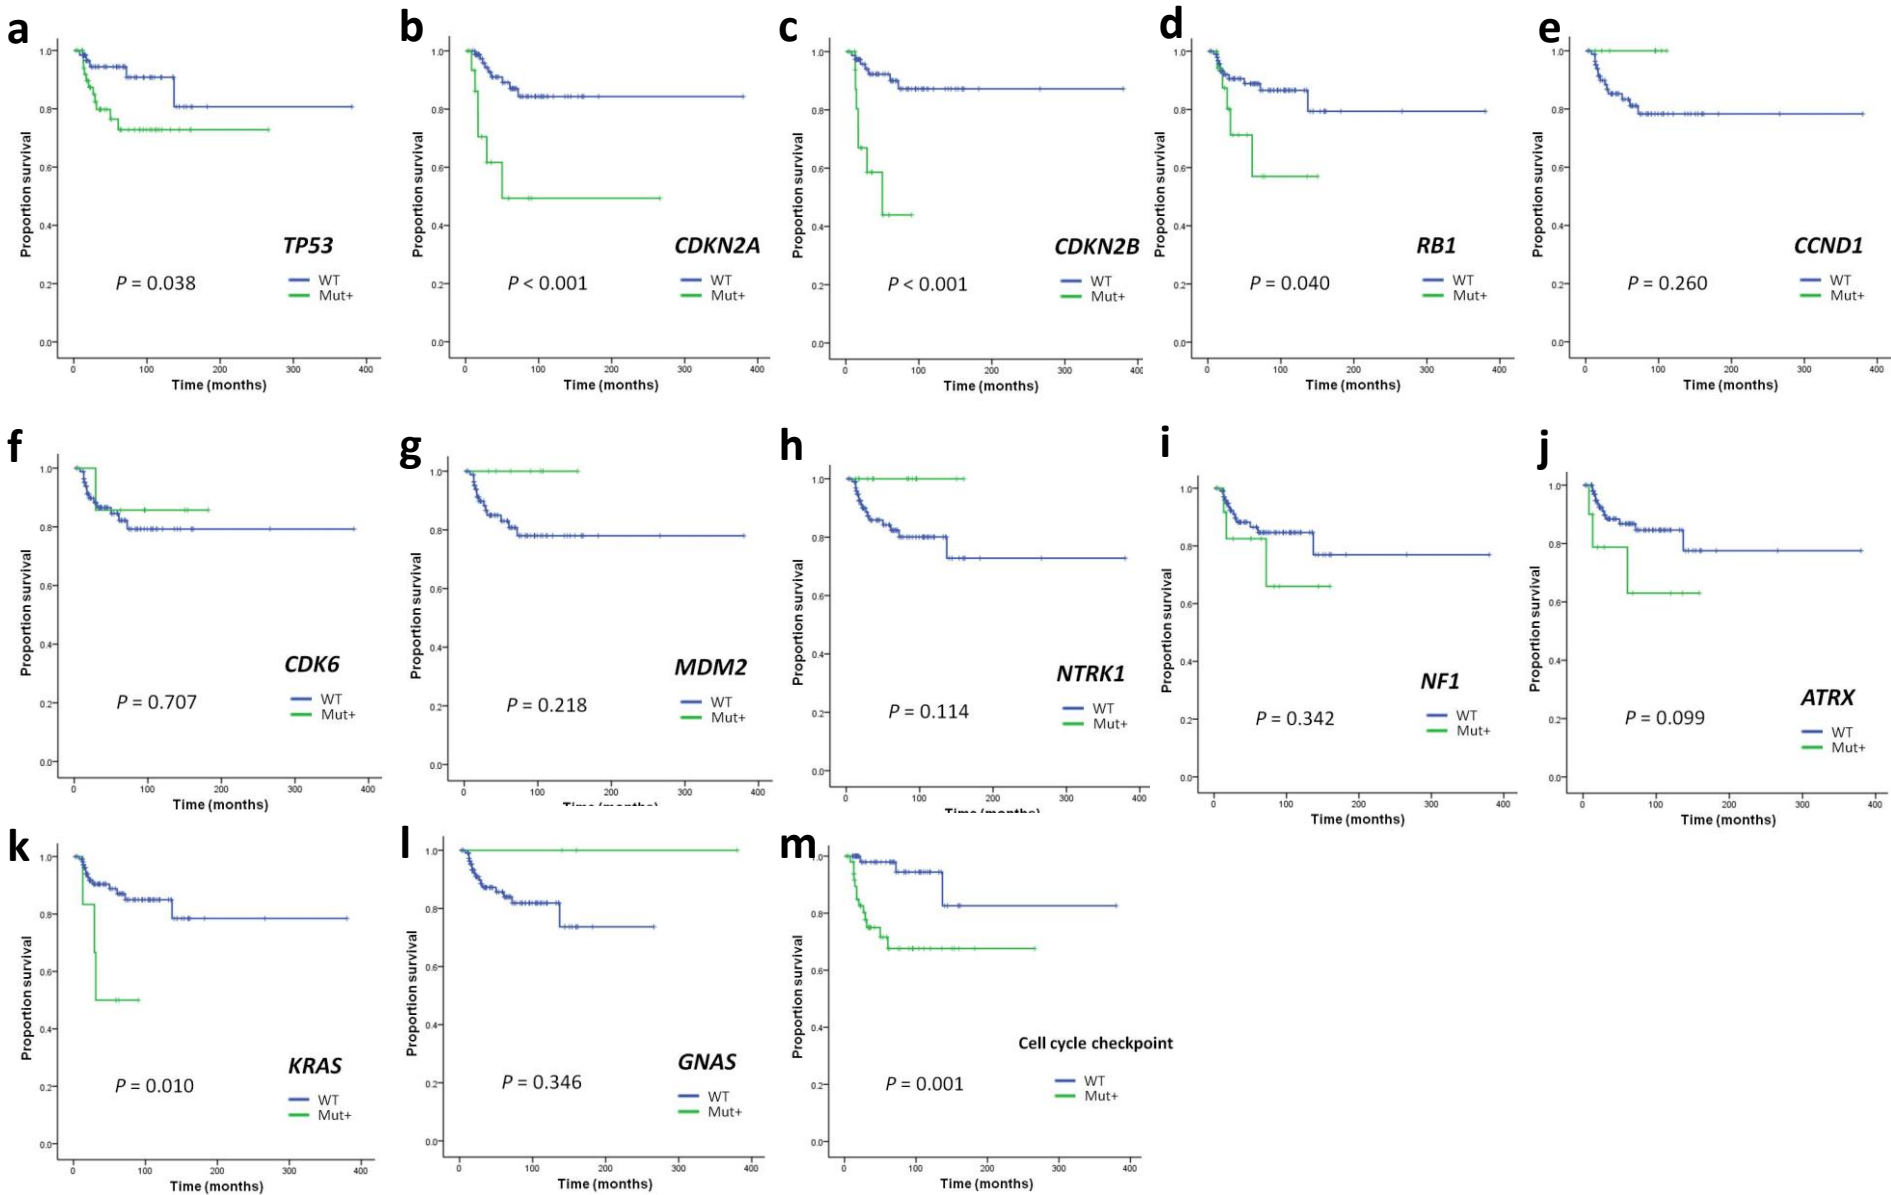

**Supplementary Figure 4. Kaplan-Meier survival plots of overall survival stratified by absence or presence of gene alterations**

*TP53* (a), *CDKN2A* (b), *CDKN2B* (c), *RB1* (d), *CCND1* (e), *CDK6* (f), *MDM2* (g), *NTRK1* (h), *NF1* (i), *ATRX* (j), amplification of *KRAS* (k), somatic mutation of *GNAS* (l), and cell cycle checkpoints overall (m).

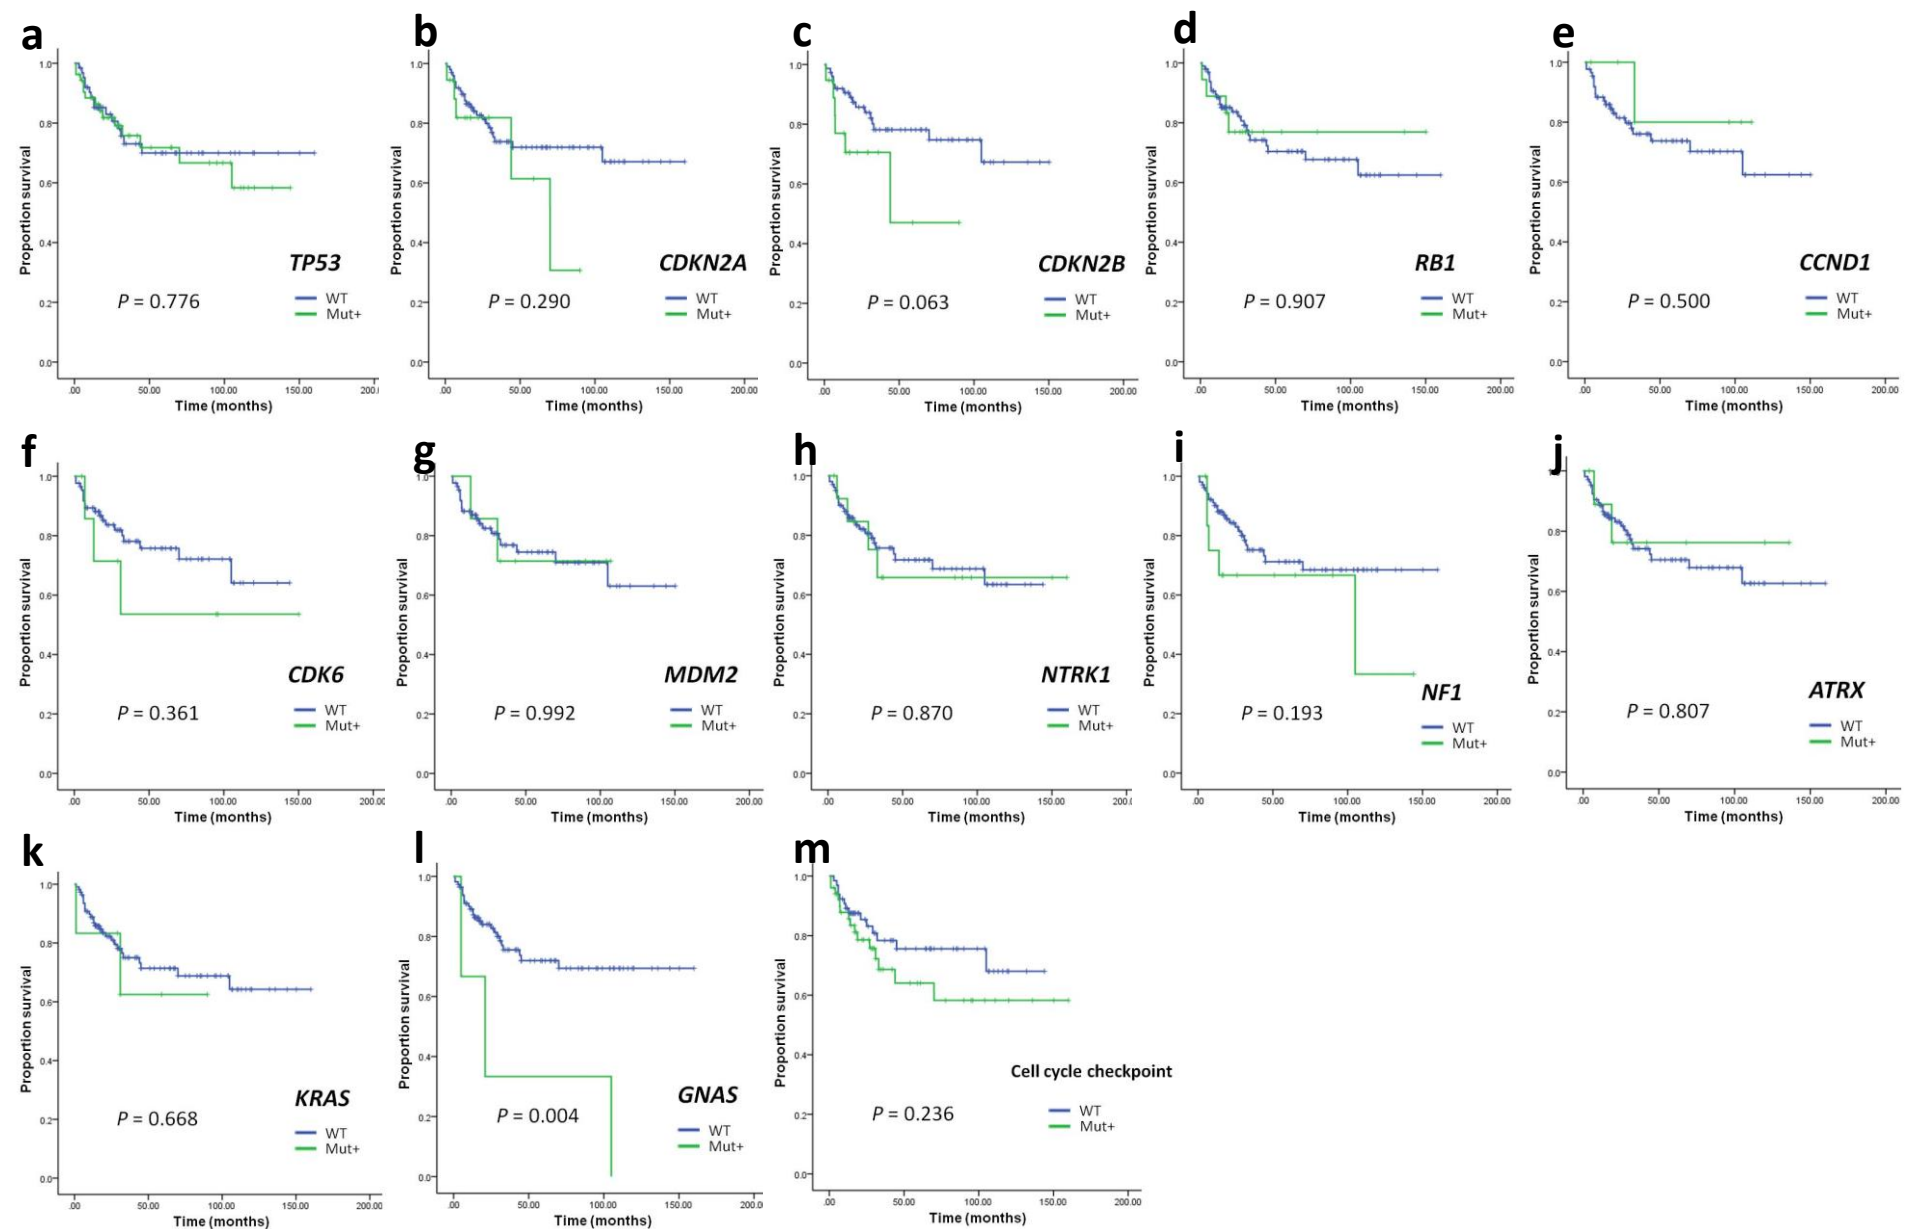

**Supplementary Figure 5. Kaplan-Meier survival plots of local recurrence-free survival stratified by absence or presence of gene alterations**

*TP53* (a), *CDKN2A* (b), *CDKN2B* (c), *RB1* (d), *CCND1* (e), *CDK6* (f), *MDM2* (g), *NTRK1* (h), *NF1* (i), *ATRX* (j), amplification of *KRAS* (k), somatic mutation of *GNAS* (l), and cell cycle checkpoints overall (m).

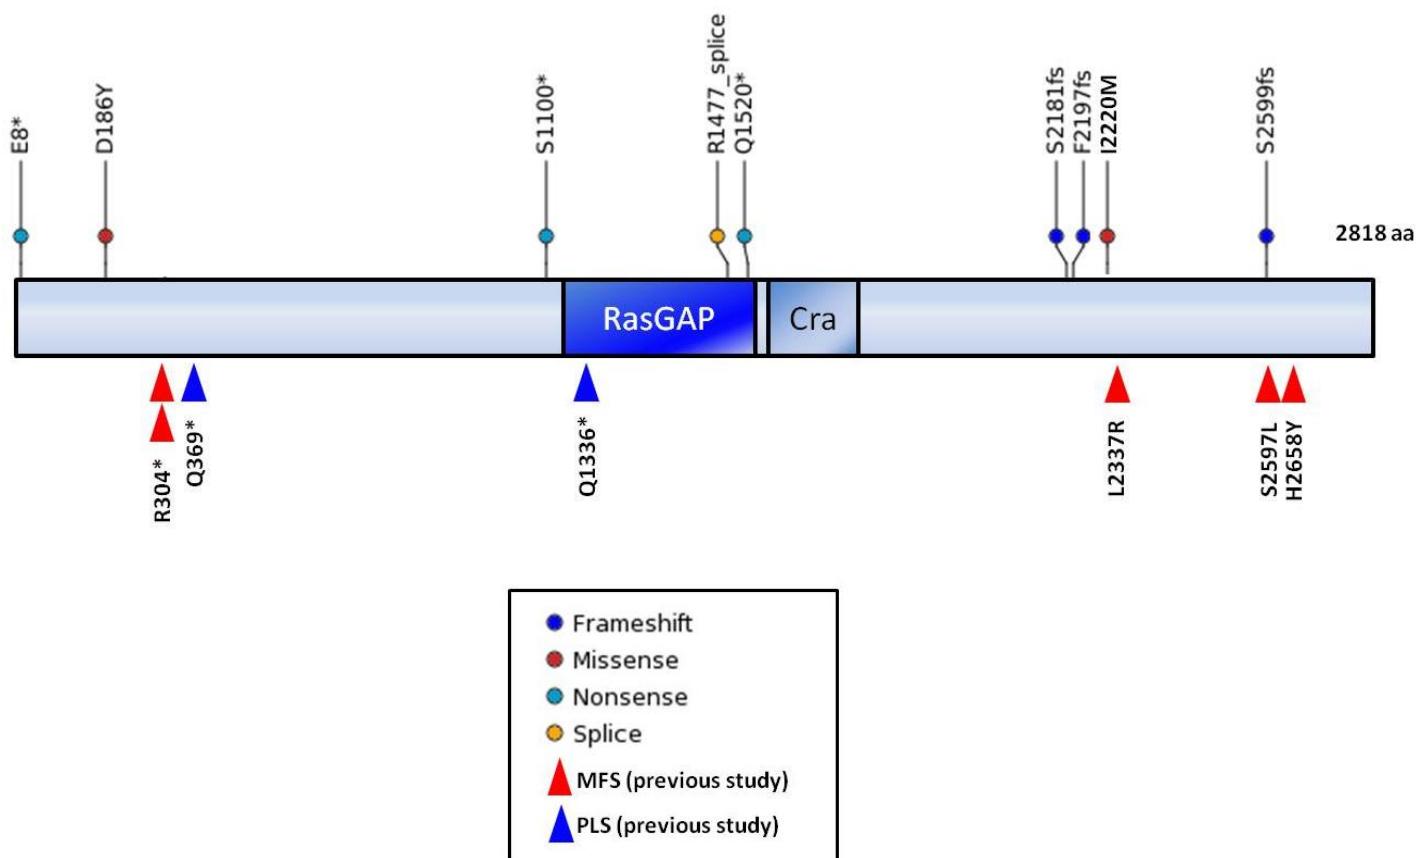

### Supplementary Figure 6. NF1 mutations in the present and previous studies in MFS

The location of somatic mutations in NF1 observed in this study is indicated above a schematic of the NF1 protein, and those previously reported in MFS (blue triangles) and PLS (red triangles) are indicated below.

Types of mutations are indicated by color: frameshift indel, blue; missense, red; nonsense, light blue; and splice site, orange.

# Flowchart

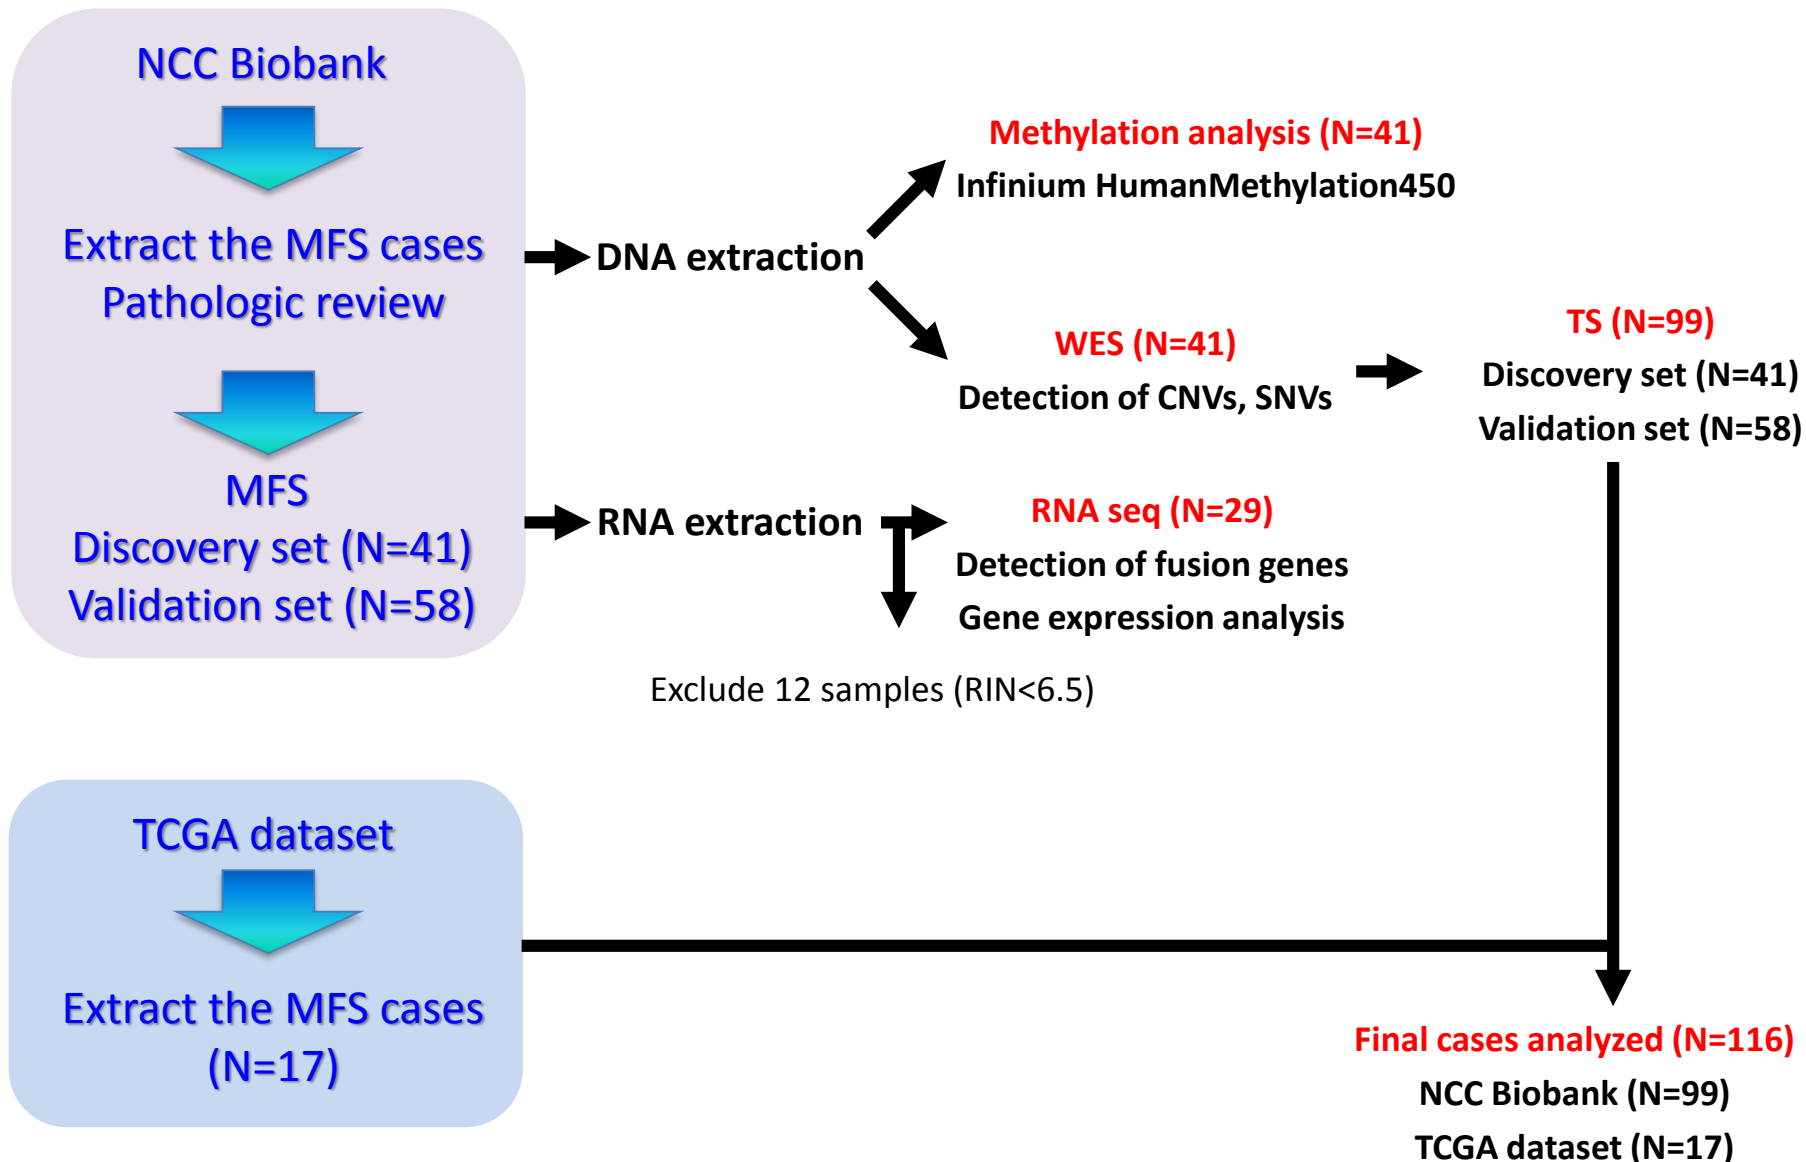

Supplementary Figure 7. Flowchart of the analysis



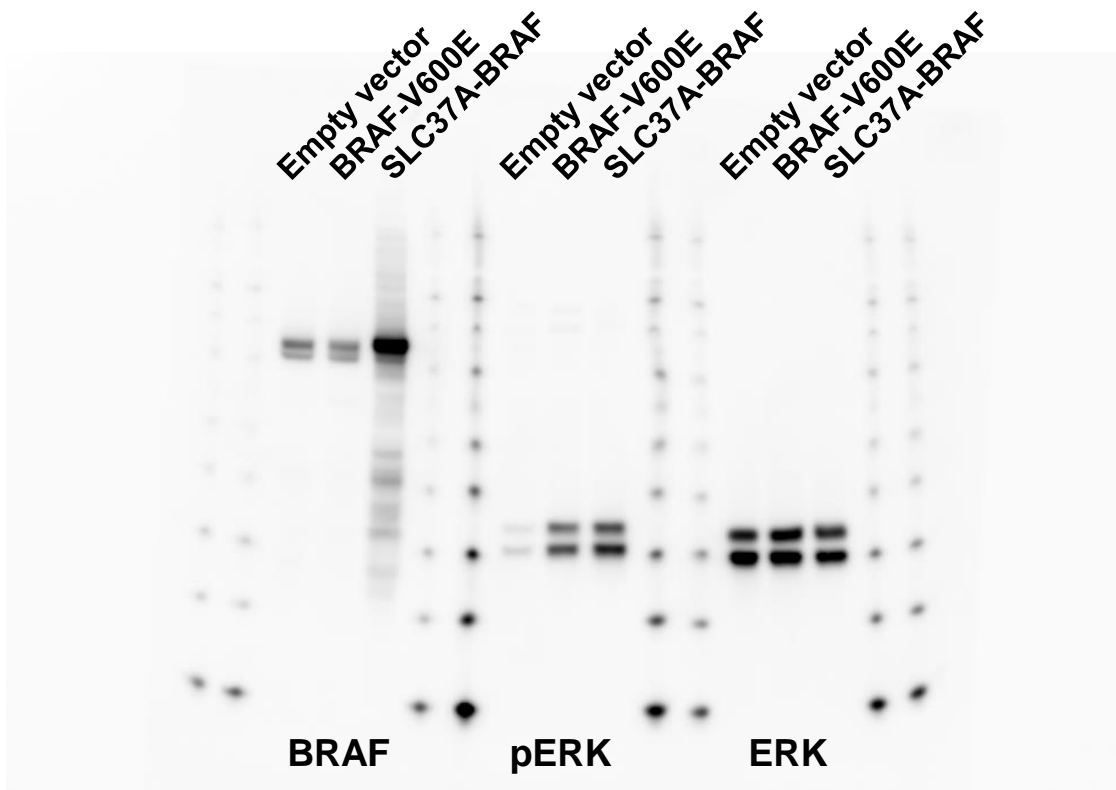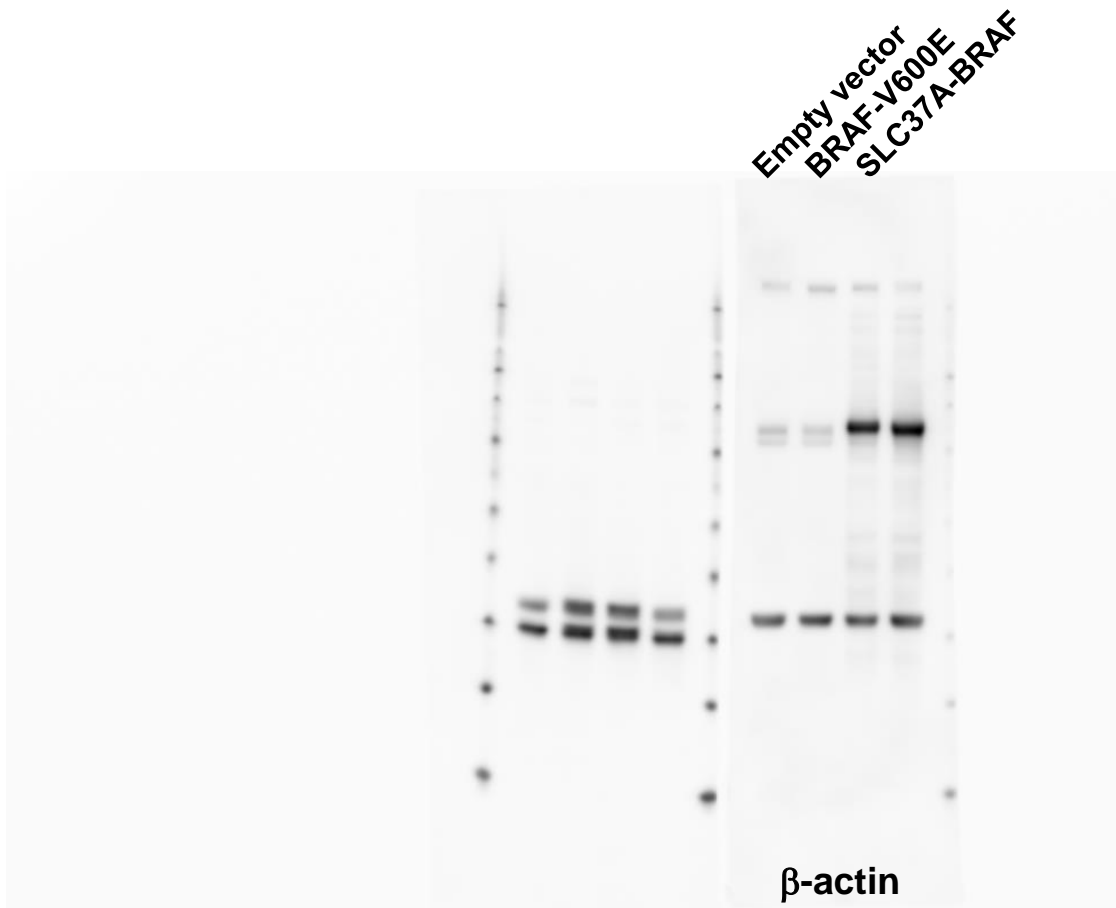

Supplementary Figure 8. Original images of the immunoblots shown in Fig. 3b

**Supplementary Table 1. List of 140 genes included in the targeted capture sequencing**

|               |               |                 |                 |               |                |                  |
|---------------|---------------|-----------------|-----------------|---------------|----------------|------------------|
| <i>ABCA13</i> | <i>CIC</i>    | <i>FGFR2</i>    | <i>HYDIN</i>    | <i>MEP1A</i>  | <i>NTRK1</i>   | <i>SI00A3</i>    |
| <i>AEN</i>    | <i>CLIP2</i>  | <i>FGFR3</i>    | <i>IDH1</i>     | <i>MET</i>    | <i>OR4X1</i>   | <i>SAMSN1</i>    |
| <i>ALK</i>    | <i>CTNNB1</i> | <i>FGFR4</i>    | <i>IDH2</i>     | <i>MMEL1</i>  | <i>PCDH19</i>  | <i>SETD2</i>     |
| <i>AMACR</i>  | <i>DAXX</i>   | <i>FLT3</i>     | <i>INPPL1</i>   | <i>MST1R</i>  | <i>PDGFRA</i>  | <i>SKP2</i>      |
| <i>ANK1</i>   | <i>DCC</i>    | <i>FLT4</i>     | <i>JAK1</i>     | <i>MTAP</i>   | <i>PDGFRB</i>  | <i>SMARCA4</i>   |
| <i>ARID1A</i> | <i>DNMT1</i>  | <i>FOXA1</i>    | <i>JAK2</i>     | <i>MTHFR</i>  | <i>PI4KA</i>   | <i>SMARCB1</i>   |
| <i>ARID1B</i> | <i>DNMT3A</i> | <i>FRYL</i>     | <i>JAK3</i>     | <i>MUC17</i>  | <i>PIK3CA</i>  | <i>STAT3</i>     |
| <i>ARID2</i>  | <i>EGFR</i>   | <i>GAS8</i>     | <i>KDM5C</i>    | <i>MYC</i>    | <i>PIK3R1</i>  | <i>STK11</i>     |
| <i>ASS1</i>   | <i>EPHA1</i>  | <i>GATA3</i>    | <i>KDM6A</i>    | <i>MYCL1</i>  | <i>PIK3R3</i>  | <i>SYK</i>       |
| <i>ATP1A3</i> | <i>EPHA5</i>  | <i>GNAS</i>     | <i>KIAA1199</i> | <i>MYOCD</i>  | <i>PLEKHA7</i> | <i>TDRD5</i>     |
| <i>ATR</i>    | <i>EPHA7</i>  | <i>GPR64</i>    | <i>KIAA1549</i> | <i>NACA</i>   | <i>PML</i>     | <i>TERT</i>      |
| <i>ATRX</i>   | <i>EPHA8</i>  | <i>GRIA1</i>    | <i>KIAA2022</i> | <i>NBPF1</i>  | <i>POF1B</i>   | <i>TET2</i>      |
| <i>BRAF</i>   | <i>ERBB2</i>  | <i>GRIN2B</i>   | <i>KIT</i>      | <i>NF1</i>    | <i>PRAMEF1</i> | <i>TIGD2</i>     |
| <i>CAMTA1</i> | <i>ERBB3</i>  | <i>H3F3A</i>    | <i>KRAS</i>     | <i>NKX2-1</i> | <i>PRDM1</i>   | <i>TMPRSS11F</i> |
| <i>CCND1</i>  | <i>ERBB4</i>  | <i>H3F3B</i>    | <i>LAMA4</i>    | <i>NLRP9</i>  | <i>PTEN</i>    | <i>TNXB</i>      |
| <i>CDC73</i>  | <i>ERC2</i>   | <i>HIST1H3B</i> | <i>LTK</i>      | <i>NOTCH1</i> | <i>PTK2B</i>   | <i>TP53</i>      |
| <i>CDH1</i>   | <i>EXT1</i>   | <i>HOXA11</i>   | <i>MAP2</i>     | <i>NOTCH2</i> | <i>PTPRB</i>   | <i>UNC80</i>     |
| <i>CDK6</i>   | <i>EZH2</i>   | <i>HOXA13</i>   | <i>MARVELD3</i> | <i>NOTCH3</i> | <i>RB1</i>     | <i>WISP2</i>     |
| <i>CDKN2A</i> | <i>FBXW7</i>  | <i>HOXA9</i>    | <i>MCYN</i>     | <i>NPM1</i>   | <i>RET</i>     | <i>WT1</i>       |
| <i>CDKN2B</i> | <i>FGFR1</i>  | <i>HRAS</i>     | <i>MDM2</i>     | <i>NRAS</i>   | <i>RTL1</i>    | <i>ZCCHC6</i>    |

**Promoter**

These genes were chosen on the basis of the WES data of 41 MFSs (*p*-values) and the associated genes. Genes of interest from a review of the published literature were also chosen.

WES, whole-exome sequencing; MFS, myxofibrosarcoma.

**Supplementary Table 2. Comparison of major alterations in various soft tissue sarcomas with complex karyotypes using our data and TCGA dataset (N = 290)**

| Altered gene  | DDLS (N = 50),<br>% | LMS (N = 80), % | MFS (N = 116),<br>% | UPS (N = 44), % | P- value |
|---------------|---------------------|-----------------|---------------------|-----------------|----------|
| <i>TP53</i>   | 4.0                 | 61.3            | 45.7                | 63.6            | <0.001   |
| <i>MDM2</i>   | 94.0                | 0.0             | 6.0                 | 0.0             | <0.001   |
| <i>CDKN2A</i> | 6.0                 | 7.5             | 15.5                | 18.2            | 0.104    |
| <i>CDKN2B</i> | 6.0                 | 7.5             | 15.5                | 18.2            | 0.104    |
| <i>RB1</i>    | 0.0                 | 37.5            | 18.1                | 36.4            | <0.001   |
| <i>CCND1</i>  | 8.0                 | 2.5             | 6.0                 | 0.0             | 0.180    |
| <i>CDK6</i>   | 0.0                 | 0.0             | 6.9                 | 9.1             | 0.014    |
| <i>CDK4</i>   | 86.0                | 0.0             | 0.0                 | 2.3             | <0.001   |
| <i>NF1</i>    | 8.0                 | 3.8             | 11.2                | 4.5             | 0.218    |
| <i>PTEN</i>   | 0.0                 | 18.8            | 3.4                 | 6.8             | <0.001   |
| <i>KRAS</i>   | 8.0                 | 1.3             | 6.9                 | 2.3             | 0.170    |
| <i>NTRK1</i>  | 8.0                 | 2.5             | 9.5                 | 11.4            | 0.216    |
| <i>SYK</i>    | 4.0                 | 1.3             | 3.4                 | 0.0             | 0.456    |
| <i>PIK3CA</i> | 0.0                 | 2.5             | 0.9                 | 6.8             | 0.076    |
| <i>GNAS</i>   | 8.0                 | 1.3             | 8.6                 | 6.8             | 0.184    |
| <i>JAK1</i>   | 14.0                | 3.8             | 4.3                 | 4.5             | 0.063    |
| <i>FOXA1</i>  | 0.0                 | 1.3             | 6.9                 | 4.5             | 0.089    |
| <i>NKX2-1</i> | 0.0                 | 0.0             | 6.0                 | 0.0             | 0.013    |
| <i>ATRX</i>   | 34.0                | 16.3            | 8.6                 | 31.8            | <0.001   |
| <i>TET2</i>   | 2.0                 | 1.3             | 3.4                 | 2.3             | 0.795    |
| <i>SETD2</i>  | 0.0                 | 2.5             | 2.6                 | 4.5             | 0.551    |
| <i>FLT4</i>   | 10.0                | 1.3             | 4.3                 | 0.0             | 0.036    |
| <i>CDH1</i>   | 0.0                 | 0.0             | 2.6                 | 0.0             | 0.208    |

**Supplementary Table 3. Hazard ratio stratified by presence or absence of gene alteration (Cox proportional hazards model, univariate analysis)**

| Altered gene  | Frequency (%) | Overall survival      |                 | Metastasis-free survival |                 | Local recurrence-free survival |                 |
|---------------|---------------|-----------------------|-----------------|--------------------------|-----------------|--------------------------------|-----------------|
|               |               | Hazard ratio (95% CI) | <i>P</i> -value | Hazard ratio (95% CI)    | <i>P</i> -value | Hazard ratio (95% CI)          | <i>P</i> -value |
| <i>TP53</i>   | 46%           | 2.92 (1.01–8.42)      | 0.048           | 1.38 (0.65–2.94)         | 0.405           | 1.11 (0.54–2.30)               | 0.777           |
| <i>RBI</i>    | 18%           | 2.91 (1.00–8.42)      | 0.049           | 2.32 (0.98–5.52)         | 0.056           | 0.94 (0.33–2.70)               | 0.907           |
| <i>CDKN2A</i> | 16%           | 10.85 (3.69–31.93)    | <0.001          | 3.42 (1.43–8.17)         | 0.006           | 1.90 (0.69–5.24)               | 0.394           |
| <i>CDKN2B</i> | 16%           | 7.52 (2.51–22.50)     | <0.001          | 3.06 (1.27–7.37)         | 0.012           | 2.41 (0.92–6.32)               | 0.073           |
| <i>NFI</i>    | 11%           | 1.82 (0.52–6.40)      | 0.350           | 0.99 (0.30–3.30)         | 0.992           | 1.88 (0.72–4.93)               | 0.201           |
| <i>NTRK1</i>  | 9%            | 0.04 (0.00–20.67)     | 0.312           | 2.12 (0.85–5.25)         | 0.106           | 1.09 (0.38–3.14)               | 0.870           |
| <i>GNAS</i>   | 9%            | 0.04 (0.00–1044.34)   | 0.540           | 0.04 (0.00–185.69)       | 0.463           | 4.86 (1.46–16.19)              | 0.010           |
| <i>ATRX</i>   | 9%            | 2.75 (0.78–9.66)      | 0.114           | 1.37 (0.41–4.57)         | 0.604           | 0.84 (0.20–3.52)               | 0.808           |
| <i>KRAS</i>   | 7%            | 4.58 (1.29–16.30)     | 0.019           | 4.82 (1.65–14.06)        | 0.004           | 1.00 (1.00–1.00)               | 0.351           |
| <i>CDK6</i>   | 7%            | 0.68 (0.09–5.21)      | 0.709           | 1.70 (0.50–5.75)         | 0.394           | 1.75 (0.52–5.92)               | 0.369           |
| <i>MDM2</i>   | 6%            | 0.04 (0.00–99.91)     | 0.425           | 0.51 (0.07–3.78)         | 0.508           | 0.99 (0.23–4.26)               | 0.992           |
| <i>CCND1</i>  | 6%            | 0.04 (0.00–189.51)    | 0.463           | 0.47 (0.06–3.47)         | 0.456           | 0.51 (0.07–3.79)               | 0.509           |

CI, confidence interval.
